# Remifentanyl Induces Systemic Arterial Vasodilation in Humans with a Total Artificial Heart

Alexandre Ouattara, M.D.,\* Gilles Boccard, M.D., Ph.D.,\* Uwe Köckler, M.D.,† Patrick Lecomte, M.D.,‡  
Pascal Leprince, M.D.,‡ Philippe Léger, M.D.,\* Bruno Riou, M.D., Ph.D.,§ Akthar Rama, M.D.,‡ Pierre Coriat, M.D.||

**Background:** To assess intrinsic vascular effects of remifentanyl, increased concentrations were infused in critically ill patients with a total artificial heart.

**Methods:** In the early postoperative period after implantation of a total artificial heart, nine ventilated patients requiring short general anesthesia were included in this study. After anesthesia was induced with 0.3 mg/kg intravenous etomidate, the artificial heart settings were modified to render cardiac output "pre-load-independent." While maintenance of anesthesia was ensured by a continuous infusion of etomidate, increased concentrations of remifentanyl (from 0.1 to 1  $\mu\text{g} \cdot \text{kg}^{-1} \cdot \text{min}^{-1}$ ) were infused in steps of 5 min under hemodynamic monitoring, including left and right atrial pressures, systemic and pulmonary arterial pressures, and left and right cardiac indices. The invasive procedure was started under the highest concentration of remifentanyl tolerated by the patient. Infusion of remifentanyl was stopped at the end of the invasive procedure, while etomidate infusion was maintained. New hemodynamic measurements were performed at the end of the 12-min recovery period.

**Results:** Remifentanyl produced a dose-dependent and significant decrease in systemic arterial pressure and vascular resistances ( $n = 9$ ) from a concentration of 0.25  $\mu\text{g} \cdot \text{kg}^{-1} \cdot \text{min}^{-1}$ . No significant changes were observed on pulmonary vascular resistances ( $n = 6$ ). Neither right ( $n = 9$ ) nor left ( $n = 6$ ) atrial pressures were affected by remifentanyl infusion. Hemodynamic variables returned to baseline value over the 12-min recovery period.

**Conclusions:** In humans with a total artificial heart, remifentanyl induces a systemic arterial vasodilation without significant effect on the capacitance vessels.

REMIFENTANIL is a potent  $\mu$ -opioid receptor agonist with attractive pharmacokinetic properties.<sup>1</sup> It has been proposed by some cardiac anesthesiologists as an agent of choice for patients undergoing fast-track cardiac surgery.<sup>2-4</sup> Although remifentanyl is now clinically widely

used in cardiac surgical patients,<sup>2-8</sup> some studies have indicated that this opioid may be associated to significant hemodynamic changes.<sup>9-12</sup> These hemodynamic changes are characterized by decreases in arterial pressure, heart rate, cardiac output, and systemic vascular resistance.<sup>10-12</sup> Unfortunately, little information is available in the literature regarding the mechanism behind the hypotensive effect of remifentanyl. In isolated human right atrial trabeculae, remifentanyl impairs neither inotropic nor lusitropic properties of the myocardium.<sup>13</sup> However, Unlügenc *et al.*<sup>14</sup> reported that remifentanyl induces vasorelaxation in isolated rat thoracic aorta by an endothelium-dependent mechanism. Although useful, these *in vitro* studies present serious limitations. As previously reported by our group,<sup>15-17</sup> the implantation of an artificial heart as a bridge to cardiac transplantation in patients with end-stage cardiac failure offers an unique opportunity to assess the intrinsic peripheral vascular effects of anesthetic drugs independently of their myocardial influences in humans. Therefore, we evaluated intrinsic vascular effects of remifentanyl in critically ill patients in the early postoperative period after implantation of a CardioWest (CardioWest Technologies Inc., Tucson, AZ) total artificial heart and in whom short general anesthesia was required for an invasive procedure.

## Materials and Methods

### Patients

The study was conducted at the Institute of Cardiology in the Pitié-Salpêtrière Hospital (Paris, France) from December 2001 to August 2003 and was approved by our institutional medical ethics committee. Because care of patients conformed to standard procedures currently used in our cardiac intensive care unit, authorization was granted to waive informed consent for the study. We studied nine adult male patients who were admitted to the cardiac intensive care unit after implantation of the CardioWest total artificial heart. The total artificial heart was implanted in these patients because of the rapid onset of terminal congestive heart failure. In six patients, terminal cardiac failure resulted from dilated cardiomyopathy. In two patients, acute cardiac failure was related to a massive myocardial infarction. The remaining patient experienced severe hypertrophic cardiomyopathy. Because these patients were critically ill, they were systematically admitted to our cardiac intensive care unit after implantation of the total artificial heart. Mechanical ventilation with standard variables (controlled assisted

This article is featured in "This Month in Anesthesiology."  
Please see this issue of ANESTHESIOLOGY, page 5A.

\* Assistant Professor, † Staff Anesthesiologist, || Professor of Anesthesiology, Chairman, Department of Anesthesiology, ‡ Assistant Professor, Department of Cardiothoracic and Vascular Surgery, § Professor of Anesthesiology, Chairman, Department of Emergency Medicine and Surgery.

Received from the Institut de Cardiologie, Département d'Anesthésie-Réanimation, Service de Chirurgie Cardiothoracique et Vasculaire, and Service d'Accueil des Urgences, Assistance Publique-Hôpitaux de Paris, Centre Hospitalier Universitaire Pitié-Salpêtrière, Université Pierre et Marie Curie, Paris, France. Submitted for publication March 12, 2003. Accepted for publication September 16, 2003. Support was provided solely from institutional and/or departmental sources. Presented in part at the 10th Annual Congress of the European Society of Anaesthesiologists, Nice, France, April 6-9, 2002.

Address reprint requests to Dr. Ouattara: Département d'Anesthésie-Réanimation, Hôpital Pitié-Salpêtrière, 47 boulevard de l'Hôpital, 75651 Paris Cedex 13, France. Address electronic mail to: alexandre.ouattara@psl.ap-hop-paris.fr. Individual article reprints may be purchased through the Journal Web site, www.anesthesiology.org.

ventilation, end-tidal volume 8 ml/kg, respiratory rate 14 min<sup>-1</sup>, inspired oxygen fraction 60%, end expiratory pressure 0 cm H<sub>2</sub>O, and inspiratory time ratio 33%) was required in the early postoperative period because pulmonary edema frequently persists for a few days.

In the early postoperative period, short general anesthesia may be required to perform invasive procedures in these critically ill patients. Because the sedation used in our cardiac intensive care unit is normally based on midazolam (50–100 µg · kg<sup>-1</sup> · h<sup>-1</sup>) and morphine (30–60 µg · kg<sup>-1</sup> · h<sup>-1</sup>), a switch to a short general anesthetic technique using etomidate and remifentanyl was required. Etomidate was chosen because our group previously showed that this hypnotic agent is devoid of significant hemodynamic effect in patients with a total artificial heart.<sup>15</sup> On the other hand, remifentanyl was chosen for its short-acting pharmacokinetic profile.<sup>1</sup> As soon as the decision to perform the invasive procedure was taken, midazolam and morphine were immediately stopped, and thus, none of the nine patients received any sedative drugs during the 4 h preceding the remifentanyl infusion. During the study, depth of anesthesia was assessed by using a noninvasive BIS<sup>®</sup> monitor (BIS<sup>®</sup> XP; Aspect Medical Systems, Natick, MA).

Hemodynamic monitoring included central venous and radial arterial catheters, which were inserted percutaneously by anesthesiologists, whereas pulmonary arterial and left atrial catheters were inserted intraoperatively by surgeons. For surgical technical reasons, pulmonary and left atrial catheters were only inserted in six patients (patients 3, 4, 5, 6, 8, and 9). The following hemodynamic variables were continuously monitored: systemic arterial pressures (systolic, mean, and diastolic), right and left atrial pressures, and pulmonary arterial pressures (systolic, mean, and diastolic). Left and right cardiac indices were calculated by the cardiac diagnostic unit of the Utah heart drive console, and the systemic and pulmonary vascular resistances were calculated by using standard formulae. Patients were not eligible for this study if high doses of norepinephrine (> 0.5 µg · kg<sup>-1</sup> · min<sup>-1</sup>) and/or epinephrine (> 0.1 µg · kg<sup>-1</sup> · min<sup>-1</sup>) were required to maintain arterial pressure.

#### *The CardioWest Total Artificial Heart*

A 70 ml-CardioWest total artificial heart was implanted as a bridge to transplantation because the patients had a rapid deterioration of hemodynamic status. Function of the artificial ventricles was continuously monitored by the cardiac output diagnostic unit of the Utah drive console, which calculates right and left cardiac output by multiplying right and left end-diastolic volumes (obtained from the diastolic area of the exhaust airflow under the curve of each ventricle) with heart rate. End-diastolic volume was measured by a flow transducer attached to the exhaust port of each drive system. The

bias and precision of the cardiac output measurement by the Utah heart drive console have been estimated as being 2 and 7%, respectively.<sup>17</sup> The CardioWest total artificial heart settings included heart rate, drive pressures of the ventricles, systolic duration as a percentage of the cardiac cycle, and vacuum. The settings recommended by the manufacturer result in incomplete filling of the ventricular chamber (75–80%) as a result of adequate diastolic duration and heart rate; therefore, complete ventricular ejection must be achieved using an appropriate driving pressure. With these CardioWest settings, any decrease in atrial pressures further reduces end-diastolic ventricular volume, also reducing cardiac output, which is the product of heart rate (fixed) and end-diastolic ventricular volume (variable, according to atrial pressure). As previously reported,<sup>15–17</sup> the CardioWest settings can be modified so that the calculated cardiac output becomes “preload-independent.” Briefly, by decreasing both heart rate and systolic duration, diastolic duration is significantly increased. Under these conditions, the ventricular chamber is always fully filled before the end of the time allocated to diastolic filling, and end-diastolic volume reaches its maximum value, 70 ml. A decrease in atrial pressure is not associated with a reduction in cardiac output, as long as the ventricular chamber remains completely filled at the end of diastole. Consequently, any change observed in hemodynamic pressures is only related to a change in the vascular tone within the corresponding vascular bed. The fact that the ventricular chamber was completely filled at the end-diastolic period was confirmed by a rapid fall of the flow curves on the Utah drive. As previously reported,<sup>17</sup> we have verified that these changes do not induce any significant hemodynamic effects (data not shown).

#### *Experimental Protocol*

The nine patients included in our study required short general anesthesia to perform an invasive procedure in the early postoperative period. After anesthesia was induced with intravenous bolus of etomidate (0.3 mg/kg), a continuous infusion (0.5–1 mg · kg<sup>-1</sup> · h<sup>-1</sup>) was started to maintain a bispectral value between 40 and 50 throughout the study. The artificial heart settings were modified to render the cardiac output preload-independent. After a brief equilibration period and measurements of baseline hemodynamic variables, increased intravenous doses of remifentanyl (0.1, 0.25, 0.5, 0.75, and 1 µg · kg<sup>-1</sup> · min<sup>-1</sup>) were infused under hemodynamic monitoring. Each dose of remifentanyl was maintained during a step of 5 min, and all hemodynamic parameters were recorded at the end of each 5-min step. The increase in remifentanyl infusion was stopped as soon as systolic arterial pressure decreased below 80 mmHg; no nociceptive stimuli were performed before reaching the highest concentration. The invasive procedure was started under the highest concentration of remifentanyl

**Table 1. Clinical Characteristics of the Nine Patients Studied**

| Patient No. | Body Surface Area, m <sup>2</sup> | Delay between Implantation of CardioWest and Study, days | Invasive Procedure Necessitating Analgesia | Days with Implant | Outcome  |
|-------------|-----------------------------------|----------------------------------------------------------|--------------------------------------------|-------------------|----------|
| 1           | 1.90                              | 4                                                        | Transesophageal echocardiography           | 55                | Survived |
| 2           | 2.08                              | 2                                                        | Central venous catheter                    | 79                | Survived |
| 3           | 1.77                              | 5                                                        | Drive line cleaning                        | 28                | Survived |
| 4           | 2.37                              | 3                                                        | Central venous catheter                    | 62                | Survived |
| 5           | 1.73                              | 2                                                        | Central venous catheter                    | 42                | Survived |
| 6           | 1.78                              | 2                                                        | Transesophageal echocardiography           | 20                | Died     |
| 7           | 2.02                              | 2                                                        | Drive line cleaning                        | 110               | Survived |
| 8           | 1.98                              | 3                                                        | Drive line cleaning                        | 23                | Survived |
| 9           | 1.96                              | 2                                                        | Transesophageal echocardiography           | Ongoing (330)     | Survived |

tolerated by the patient. After termination of the invasive procedure, infusion of remifentanyl was stopped. To confirm that cardiovascular changes were related to remifentanyl infusion, new hemodynamic measurements were performed at the end of a 12-min recovery period, a time corresponding to four consecutive context-sensitive half-lives of remifentanyl.<sup>18</sup> Because dyscapnia can significantly affect vasoregulation, blood gas analysis was performed before to start of remifentanyl infusion to control the acid-base state of patients.

#### Statistical Analysis

Data are expressed as mean  $\pm$  SD. Comparison of several means was performed with use of repeated-measures analysis of variance and the Newman-Keuls test. A *P* value less than 0.05 was required to reject the null hypothesis. All analyses were performed with use of NCSS 6.0 software (Statistical Solutions Ltd., Cork, Ireland) on a personal computer.

## Results

The clinical characteristics of the patients are presented in table 1. The mean age of the nine patients studied was  $35 \pm 16$  yr (range, 21–63 yr). Two patients required small doses of norepinephrine, which were maintained throughout the study (patient 1,  $0.17 \mu\text{g} \cdot \text{kg}^{-1} \cdot \text{min}^{-1}$ ; patient 6,  $0.30 \mu\text{g} \cdot \text{kg}^{-1} \cdot \text{min}^{-1}$ ). Blood gas analysis showed the following values: pH,  $7.46 \pm 0.09$ ;  $\text{Paco}_2$ ,  $33 \pm 7$  mmHg;  $\text{HCO}_3^-$ ,  $23.4 \pm 3.7$  mmol/l. The intravenous bolus of etomidate induced a significant decrease in the Bispectral Index values from  $91 \pm 11$  to  $41 \pm 10$  ( $P < 0.05$ ). Subsequently, the Bispectral Index values remained stable throughout the study (range, 34–52). As expected, the changes of CardioWest settings induced no significant effect on cardiac indices (left:  $3.1 \pm 0.4$  vs.  $3.1 \pm 0.4 \text{ l} \cdot \text{min}^{-1} \cdot \text{m}^{-2}$ , not significant [NS]; right:  $3.3 \pm 0.4$  vs.  $3.2 \pm 0.34 \text{ l} \cdot \text{min}^{-1} \cdot \text{m}^{-2}$ , NS) and atrial pressures (left:  $16 \pm 8$  vs.  $11 \pm 7$  mmHg, NS; right:  $16 \pm 5$  vs.  $14 \pm 5$  mmHg, NS). The total artificial heart settings used during remifentanyl infusion are summarized in table 2. No infusion of remifentanyl necessi-

tated early termination as a result of an adverse hemodynamic event. We observed no cutaneous or bronchial adverse effects. Consequently, the invasive procedure was performed in all nine patients under a continuous remifentanyl infusion of  $1 \mu\text{g} \cdot \text{kg}^{-1} \cdot \text{min}^{-1}$ .

As expected, both right and left cardiac indices remained unchanged throughout the study (tables 3 and 4). In the systemic circulation, increased concentrations of remifentanyl induced a significant decrease in systemic arterial pressure (table 3). Remifentanyl produced a significant dose-dependent decrease in calculated indexed systemic vascular resistances of  $0.25 \mu\text{g} \cdot \text{kg}^{-1} \cdot \text{min}^{-1}$  (table 3). In the pulmonary circulation, remifentanyl showed no significant effect on arterial pressure and indexed vascular resistances (table 4). Right and left atrial pressures were not significantly affected by increased concentrations of remifentanyl (tables 3 and 4). After the termination of remifentanyl infusion, a return to baseline values was obtained for all hemodynamic variables over the 12-min recovery period (tables 3 and 4).

Because the use of norepinephrine in two patients could have affected their vascular responsiveness, we also analyzed the vascular effect of increased doses of remifentanyl in a subgroup excluding these two patients ( $n = 7$ ). At the highest intravenous dose ( $1 \mu\text{g} \cdot \text{kg}^{-1} \cdot \text{min}^{-1}$ ), the decreases in systemic and pulmonary vascular resistances were  $71 \pm 9\%$  of baseline ( $P < 0.05$ ) and  $94 \pm 13\%$  of baseline (NS), respectively. Neither right

**Table 2. CardioWest Total Artificial Heart Settings Used during the Study**

| Patient No. | Heart Rate, beats/min | Systolic Duration, % | Left Drive Pressure, mmHg | Right Drive Pressure, mmHg |
|-------------|-----------------------|----------------------|---------------------------|----------------------------|
| 1           | 95                    | 45                   | 200                       | 60                         |
| 2           | 90                    | 45                   | 200                       | 65                         |
| 3           | 90                    | 40                   | 200                       | 60                         |
| 4           | 100                   | 46                   | 200                       | 70                         |
| 5           | 90                    | 45                   | 200                       | 60                         |
| 6           | 92                    | 45                   | 205                       | 60                         |
| 7           | 99                    | 47                   | 180                       | 90                         |
| 8           | 95                    | 45                   | 210                       | 60                         |
| 9           | 90                    | 40                   | 210                       | 80                         |

**Table 3. Baseline Values and Effects of Remifentanil on Systemic Circulation (n = 9)**

| Systemic Circulation Variable                                 | Baseline Value  | Concentration of Remifentanil (% of Baseline Value), $\mu\text{g} \cdot \text{kg}^{-1} \cdot \text{min}^{-1}$ |              |               |               |               |              |
|---------------------------------------------------------------|-----------------|---------------------------------------------------------------------------------------------------------------|--------------|---------------|---------------|---------------|--------------|
|                                                               |                 | 0.1                                                                                                           | 0.25         | 0.5           | 0.75          | 1             | Recovery     |
| Left CI, $\text{l} \cdot \text{min}^{-1} \cdot \text{m}^{-2}$ | $3.1 \pm 0.4$   | $100 \pm 1$                                                                                                   | $99 \pm 1$   | $99 \pm 2$    | $99 \pm 2$    | $99 \pm 2$    | $101 \pm 2$  |
| SAP, mmHg                                                     | $115 \pm 14$    | $98 \pm 5$                                                                                                    | $92 \pm 7$   | $85 \pm 10^*$ | $81 \pm 12^*$ | $78 \pm 14^*$ | $100 \pm 3$  |
| DAP, mmHg                                                     | $52 \pm 13$     | $94 \pm 9$                                                                                                    | $87 \pm 8^*$ | $80 \pm 9^*$  | $78 \pm 10^*$ | $77 \pm 11^*$ | $96 \pm 8$   |
| MAP, mmHg                                                     | $69 \pm 16$     | $95 \pm 7$                                                                                                    | $88 \pm 6^*$ | $82 \pm 7^*$  | $79 \pm 7^*$  | $77 \pm 9^*$  | $98 \pm 6$   |
| RAP, mmHg                                                     | $14 \pm 5$      | $93 \pm 9$                                                                                                    | $92 \pm 15$  | $92 \pm 20$   | $92 \pm 22$   | $92 \pm 22$   | $102 \pm 19$ |
| SVR, $\text{dyn} \cdot \text{s} \cdot \text{cm}^{-5}$         | $1,459 \pm 330$ | $96 \pm 9$                                                                                                    | $89 \pm 8^*$ | $80 \pm 7^*$  | $77 \pm 8^*$  | $74 \pm 10^*$ | $100 \pm 8$  |

Data are presented as mean  $\pm$  SD.

\*  $P < 0.05$  vs. baseline value.

CI = cardiac index; DAP = diastolic arterial pressure; MAP = mean arterial pressure; RAP = right atrial pressure; SAP = systolic arterial pressure; SVR = systemic vascular resistance.

nor left atrial pressure was significantly affected by the remifentanil infusion in this subgroup (data not shown).

## Discussion

The principal findings of the current study are that remifentanil (1) provokes systemic arterial vasodilatation, (2) remains without significant effect on the capacitance vessels, and (3) does not significantly affect pulmonary arterial vascular tone in critically ill patients with a total artificial heart in which cardiac output is preload-independent. These systemic changes are rapidly reversible 12 min after termination of infusion of remifentanil.

Because of its potency and ultrashort pharmacokinetic profile, remifentanil has been proposed by some authors as an ideal opioid for patients with coronary artery disease.<sup>2-8,19</sup> Nevertheless, some clinical studies have reported that this opioid can induce significant cardiovascular disturbances that are potentially deleterious in coronary patients.<sup>9-12</sup> This hemodynamic instability includes a decrease in systemic vascular resistances and cardiac output that is thought to be related to a decrease of both stroke volume and heart rate.<sup>10,12,20</sup> Although these results have been confirmed in an experimental study in dogs,<sup>20</sup> few data are now available about the intrinsic mechanism of remifentanil-induced cardiovascular depression. The hypothesis of histamine release

induced by administration of remifentanil (up to 30  $\mu\text{g}/\text{kg}$ ) has been ruled out in a clinical study.<sup>11</sup> We did not measure histamine levels, but it should be pointed out that we did not observe any cutaneous or bronchial adverse effects. However, a recent *in vitro* study<sup>14</sup> showed that remifentanil produces significant direct smooth muscle relaxation in isolated thoracic aorta strips. These authors<sup>14</sup> reported that remifentanil-induced vasorelaxation is both endothelium-dependent and endothelium-independent, involving nitric oxide release and voltage-sensitive  $\text{Ca}^{2+}$  channel inhibition, respectively. Although the conditions of these *in vitro* studies differ considerably from clinical conditions, the results suggest that an intrinsic peripheral vascular effect may be involved in cardiovascular disturbances observed clinically. The benefit of the implantation of a CardioWest total artificial heart, as a bridge to cardiac transplantation, in patients with prelethal heart failure has been demonstrated previously.<sup>21,22</sup> Because these patients are critically ill during the immediate postoperative period, anesthesiologists in the intensive care unit may have to induce general anesthesia in these patients to allow invasive procedures. Therefore, implantation of the total artificial heart offers a unique opportunity to evaluate intrinsic vascular effect of drugs by eliminating myocardial interference.<sup>15-17</sup> By modifying the recommended settings (decrease in heart rate and systolic

**Table 4. Baseline Values and Effects of Remifentanil on Pulmonary Circulation (n = 6)**

| Pulmonary Circulation Variables                                | Baseline Value | Concentration of Remifentanil (% of Baseline Value), $\mu\text{g} \cdot \text{kg}^{-1} \cdot \text{min}^{-1}$ |              |              |             |             |              |
|----------------------------------------------------------------|----------------|---------------------------------------------------------------------------------------------------------------|--------------|--------------|-------------|-------------|--------------|
|                                                                |                | 0.1                                                                                                           | 0.25         | 0.5          | 0.75        | 1           | Recovery     |
| Right CI, $\text{l} \cdot \text{min}^{-1} \cdot \text{m}^{-2}$ | $3.2 \pm 0.3$  | $99 \pm 1$                                                                                                    | $97 \pm 1$   | $97 \pm 3$   | $98 \pm 3$  | $97 \pm 3$  | $99 \pm 3$   |
| PAP systolic, mmHg                                             | $38 \pm 8$     | $97 \pm 7$                                                                                                    | $92 \pm 5$   | $90 \pm 9$   | $88 \pm 9$  | $86 \pm 10$ | $91 \pm 6$   |
| PAP diastolic, mmHg                                            | $17 \pm 7$     | $96 \pm 26$                                                                                                   | $89 \pm 20$  | $91 \pm 29$  | $87 \pm 25$ | $87 \pm 29$ | $97 \pm 28$  |
| MPAP, mmHg                                                     | $23 \pm 5$     | $99 \pm 12$                                                                                                   | $92 \pm 5$   | $94 \pm 17$  | $87 \pm 13$ | $88 \pm 13$ | $99 \pm 4$   |
| LAP, mmHg                                                      | $11 \pm 7$     | $93 \pm 11$                                                                                                   | $89 \pm 15$  | $86 \pm 20$  | $86 \pm 17$ | $93 \pm 23$ | $105 \pm 16$ |
| PVR, $\text{dyn} \cdot \text{s} \cdot \text{cm}^{-5}$          | $303 \pm 113$  | $104 \pm 12$                                                                                                  | $102 \pm 12$ | $105 \pm 22$ | $94 \pm 14$ | $95 \pm 12$ | $98 \pm 8$   |

Data are presented as mean  $\pm$  SD.

\* No significant difference vs. baseline value.

CI = cardiac index; LAP = left atrial pressure; MPAP = mean pulmonary arterial pressure; PAP = pulmonary arterial pressure; PVR = pulmonary vascular resistance.



duration), cardiac output becomes preload-independent and afterload-independent. Because the decrease in heart rate is compensated for by an increase in end-diastolic volume,<sup>15-17</sup> cardiac output is not affected by these new settings.

In our study, we tested increased concentrations of remifentanyl from 0.1 to 1  $\mu\text{g} \cdot \text{kg}^{-1} \cdot \text{min}^{-1}$ . These ranges are currently used during cardiac surgery<sup>2,4,7,12</sup> and even during general surgery.<sup>23</sup> In the current study, remifentanyl provoked a dose-dependent decrease in mean arterial pressure and systemic vascular resistances, with maximal decreases of  $23 \pm 9$  and  $26 \pm 10\%$ , respectively. Our results are consistent with those previously reported by different authors in patients undergoing coronary bypass grafting during anesthesia based on propofol and remifentanyl.<sup>10,12</sup> Remifentanyl did not induce significant effects on right and left atrial pressures in patients with a total artificial heart in which cardiac output was preload-independent. These findings suggest that remifentanyl is devoid of significant effects on capacitance vessels. Although *in vivo* the cardiovascular changes of remifentanyl are the result of myocardial and peripheral vascular effects, our results are consistent with those of Elliott *et al.*,<sup>12</sup> who found that central venous pressure and pulmonary capillary wedge pressure were not significantly modified by increased concentrations from 0.2 to 1  $\mu\text{g} \cdot \text{kg}^{-1} \cdot \text{min}^{-1}$  in cardiac surgical patients. In addition, the absence of a significant effect of remifentanyl on venous return has been previously reported in an *in vivo* study in dogs.<sup>20</sup> This finding should be taken into account for the management of decreasing blood pressure effect of remifentanyl. During our study, we observed that remifentanyl induced no significant effect on pulmonary arterial vascular tone. Because we studied only six patients, we cannot absolutely eliminate an intrinsic pulmonary arterial effect of remifentanyl. However, this result represents an interesting finding that must be taken into account during the anesthetic management of cardiac surgical patients with pulmonary hypertension.

To confirm that hemodynamic changes observed during short general anesthesia were related to the remifentanyl infusion, we measured new hemodynamic parameters at a time equal to four consecutive context-sensitive half-lives. This half-life was previously found to be 3 min.<sup>18</sup> The return to baseline value of all hemodynamic parameters over the 12-min recovery period confirmed that cardiovascular changes were only related to remifentanyl infusion.

The following points must be considered in the assessment of the clinical relevance of our study. First, the current study was conducted in critically ill patients who were highly stressed and had a long history of cardiovascular disease that almost certainly had altered their vascular responsiveness. Therefore, we cannot exclude that vascular effects of remifentanyl could be different from

those observed in healthy surgical patients. In addition, two of our nine patients required low-dose norepinephrine to maintain arterial pressure. Although the inclusion of these patients does not seem to affect our results, we cannot exclude that the use of norepinephrine might have underestimated the systemic vascular effect of remifentanyl. Second, no hemodynamic pressures were recorded under zero-flow conditions. Consequently, calculated systemic vascular resistances did not take into account the waterfall phenomenon. Because assessing this phenomenon necessitates briefly disconnecting the drive lines,<sup>16,17</sup> for ethical reasons, it was not possible for us to measure the true downstream pressure of the arterial compartment of our patients. Consequently, the absolute values of systemic vascular resistances are probably overestimated by the standard formulae. This problem does not seem to apply to the pulmonary circulation because pulmonary arteries are characterized by a zero-flow pressure less than the pressure within pulmonary veins.<sup>16,17</sup> However, we do not think that this point interferes with the changes in systemic vascular resistances observed during remifentanyl infusion because our results are expressed as percentage of baseline. Third, patients with a total artificial heart frequently have normal basic physiologic function including feeding and cycling after tracheal extubation. Nevertheless, we cannot exclude that the implantation of artificial hearts modifies vascular responses to vasodilator agents. Fourth, we reported that remifentanyl is devoid of significant effect on pulmonary circulation. Because the number of patients was small ( $n = 6$ ), the power of our analysis was low, and a moderate effect of remifentanyl on pulmonary circulation cannot be completely ruled out. Fifth, our results are purely observational and do not allow us to assess the mechanism of arterial vasodilation of remifentanyl.

In conclusion, in patients with a total artificial heart in which cardiac output is preload-independent, remifentanyl induces a dose-dependent and significant systemic arterial vasodilation but remains without effect on pulmonary arteries. In addition, remifentanyl is devoid of significant effects on capacitance vessels. Although our results were obtained in critically ill patients, this observational study suggests that systemic arterial vasorelaxation is involved in remifentanyl-induced cardiovascular disturbances.

The authors thank David Baker, D.M., F.R.C.A. (Department of Anesthesiology, Centre Hospitalier Universitaire Necker-Enfants Malades, Paris), for reviewing the manuscript.

## References

1. Egan TD, Minto CF, Hermann DJ, Barr J, Muir KT, Shafer SL: Remifentanyl versus alfentanil: Comparative pharmacokinetics and pharmacodynamics in healthy adult male volunteers. *ANESTHESIOLOGY* 1996; 84:821-33
2. Olivier P, Sirieix D, Dassier P, D'Attellis N, Baron JF: Continuous infusion of remifentanyl and target-controlled infusion of propofol for patients undergoing

cardiac surgery: A new approach for scheduled early extubation. *J Cardiothorac Vasc Anesth* 2000; 14:29-35

3. Zarate E, Latham P, White PF, Bossard R, Morse L, Douning LK, Shi C, Chi L: Fast-track cardiac anesthesia: Use of remifentanyl combined with intrathecal morphine as an alternative to sufentanil during desflurane anesthesia. *Anesth Analg* 2000; 91:283-7

4. Ouattara A, Boccard G, Lemaire S, Köckler U, Landi M, Vaissier E, Léger P, Coriat P: Target-controlled infusion of propofol and remifentanyl in cardiac anesthesia: Influence of age on predicted effect-site concentrations. *Br J Anaesth* 2003; 90:617-22

5. Myles PS, Hunt JO, Fletcher H, Watts J, Bain D, Silvers A, Buckland MR: Remifentanyl, fentanyl, and cardiac surgery: A double-blinded, randomized, controlled trial of costs and outcomes. *Anesth Analg* 2002; 95:805-12

6. Lehmann A, Zeitler C, Thaler E, Isgro F, Boldt J: Comparison of two different anesthesia regimens in patients undergoing aortocoronary bypass grafting surgery: Sufentanil-midazolam versus remifentanyl-propofol. *J Cardiothorac Vasc Anesth* 2000; 14:416-20

7. Howie MB, Cheng D, Newman MF, Pierce ET, Hogue C, Hillel Z, Bowdle TA, Bukenya D: A randomized double-blinded multicenter comparison of remifentanyl versus fentanyl when combined with isoflurane/propofol for early extubation in coronary artery bypass graft surgery. *Anesth Analg* 2001; 92:1084-93

8. Cheng DC, Newman MF, Duke P, Wong DT, Finegan B, Howie M, Fitch J, Bowdle TA, Hogue C, Hillel Z, Pierce E, Bukenya D: The efficacy and resource utilization of remifentanyl and fentanyl in fast-track coronary artery bypass graft surgery: A prospective randomized, double-blinded controlled, multi-center trial. *Anesth Analg* 2001; 92:1094-102

9. Wang JY, Winship SM, Thomas SD, Gin T, Russell GN: Induction of anesthesia in patients with coronary artery disease: A comparison between sevoflurane-remifentanyl and fentanyl-etomidate. *Anaesth Intensive Care* 1999; 27:363-8

10. Kazmaier S, Hanekop GG, Buhre W, Weyland A, Busch T, Radke OC, Zoelffel R, Sonntag H: Myocardial consequences of remifentanyl in patients with coronary artery disease. *Br J Anaesth* 2000; 84:578-83

11. Sebel PS, Hoke JF, Westmoreland C, Hug CC Jr., Muir KT, Szlam F: Histamine concentrations and hemodynamic responses after remifentanyl. *Anesth Analg* 1995; 80:990-3

12. Elliott P, O'Hare R, Bill KM, Phillips AS, Gibson FM, Mirakhur RK: Severe cardiovascular depression with remifentanyl. *Anesth Analg* 2000; 91:58-61

13. Hanouz JL, Yvon A, Guesne G, Eustratiades C, Babatasi G, Rouet R, Ducouret P, Khayat A, Bricard H, Gérard JL: The *in vitro* effects of remifentanyl, sufentanil, fentanyl, and alfentanil on isolated human right atria. *Anesth Analg* 2001; 93:543-9

14. Unlüğenc H, İtegin M, Ocal I, Ozalevli M, Güler T, Isik G: Remifentanyl produces vasorelaxation in isolated rat thoracic aorta strips. *Acta Anaesthesiol Scand* 2003; 47:65-9

15. Rouby JJ, Andreev A, Léger P, Arthaud M, Landau C, Poete P, Cabrol C, Viars P: Peripheral vascular effects of etomidate in patients with an artificial heart. *Eur J Anaesthesiol* 1990; 7:353-6

16. Rouby JJ, Léger P, Andreev A, Arthaud M, Landau C, Vicaut E, Cabrol C, Viars P: Peripheral vascular effects of halothane and isoflurane in humans with an artificial heart. *ANESTHESIOLOGY* 1990; 72:462-9

17. Rouby JJ, Andreev A, Léger P, Arthaud M, Landault C, Vicaut E, Maistre G, Eurin J, Gandjbakhch I, Viars P: Peripheral vascular effects of thiopental and propofol in humans with artificial hearts. *ANESTHESIOLOGY* 1991; 75:32-42

18. Kapila A, Glass PS, Jacobs JR, Muir KT, Hermann DJ, Shiraishi M, Howell S, Smith RL: Measured context-sensitive half-times of remifentanyl and alfentanil. *ANESTHESIOLOGY* 1995; 83:968-75

19. Lehmann A, Boldt J, Zeitler C, Thaler E, Werling C: Total intravenous anesthesia with remifentanyl and propofol for implantation of cardioverter-defibrillators in patients with severely reduced left ventricular function. *J Cardiothorac Vasc Anesth* 1999; 13:15-9

20. James MK, Vuong A, Grizzle MK, Schuster SV, Shaeffer JE: Hemodynamic effects of GI 87084B, an ultra-short acting  $\mu$ -opioid analgesic, in anesthetized dogs. *J Pharmacol Exp Ther* 1992; 263:84-91

21. Arabia FA, Copeland JG, Smith RG, Sethi GK, Arzouman DA, Pavic A, Duveau D, Keon WJ, Masters R, Foy B, Carrier M, Dembitsky W, Long J, Kormos R: International experience with the CardioWest total artificial heart as a bridge to heart transplantation. *Eur J Cardiothorac Surg* 1997; 11:S5-10

22. Griffith BP, Hardesty RL, Kormos RL, Trento A, Borovetz HS, Thompson ME, Bahnson HT: Temporary use of the Jarvik-7 total artificial heart before transplantation. *N Engl J Med* 1987; 316:130-4

23. Maguire AM, Kumar N, Parker JL, Rowbotham DJ, Thompson JP: Comparison of effects of remifentanyl and alfentanil on cardiovascular response to tracheal intubation in hypertensive patients. *Br J Anaesth* 2001; 86:90-3
